# Supplementary material for: Diagnostic Efficacy of Advanced Ultrasonography Imaging Techniques in Infants with Biliary Atresia (BA): A Systematic Review and Meta-Analysis
Source: MDPI journal article supplement (doi:10.3390/children9111676), 2022-10-31
Supplement: s1 [file s1]

### Database search strings

| Database searched                    | Search strings                                                                                                                                                                                                                                                                                                                                                                                                                                                                                                                                                                                                       |
|--------------------------------------|----------------------------------------------------------------------------------------------------------------------------------------------------------------------------------------------------------------------------------------------------------------------------------------------------------------------------------------------------------------------------------------------------------------------------------------------------------------------------------------------------------------------------------------------------------------------------------------------------------------------|
| 1. Pubmed                            | <ol style="list-style-type: none"> <li>1. Biliary atresia AND ultrasonography AND (diagnostic accuracy)</li> <li>2. Biliary atresia AND ultrasonography AND (diagnostic performance)</li> </ol>                                                                                                                                                                                                                                                                                                                                                                                                                      |
| 2. EBSCOhost<br>(CINAHL and Medline) | <ol style="list-style-type: none"> <li>1. TX biliary atresia AND TX ultrasonography AND TX diagnostic accuracy</li> <li>2. TX biliary atresia AND TX ultrasonography AND TX diagnostic performance</li> </ol>                                                                                                                                                                                                                                                                                                                                                                                                        |
| 3. Embase                            | <ol style="list-style-type: none"> <li>1. Query('biliary atresia'/exp OR 'biliary atresia') AND ('ultrasonography'/exp OR ultrasonography) AND ('diagnostic accuracy'/exp OR 'diagnostic accuracy')</li> <li>2. Query('bile duct atresia'/exp OR 'bile duct atresia'/exp/mj OR 'bile duct atresia') AND ('echography'/exp OR 'echography') AND ('diagnostic performance'/exp OR 'diagnostic performance')</li> <li>3. Query('bile duct atresia'/exp OR 'bile duct atresia'/exp/mj OR 'bile duct atresia') AND ('echography'/exp OR 'echography') AND ('diagnostic accuracy'/exp OR 'diagnostic accuracy')</li> </ol> |
| 4. Web of Science Core Collection    | ((All=(biliary atresia)) AND ALL=(ultrasonography)) AND ALL=(diagnostic performance or diagnostic accuracy)                                                                                                                                                                                                                                                                                                                                                                                                                                                                                                          |
| 5. Google scholar                    | "biliary atresia" AND ultrasonography AND (diagnostic accuracy OR performance)                                                                                                                                                                                                                                                                                                                                                                                                                                                                                                                                       |
